# Supplementary material for: Enabling improved PSF nanocomposite membrane for wastewater treatment with selective nanotubular morphology of PANI/ZnO
Source: Royal Society of Chemistry journal article supplement (doi:10.1039/d4ma00859f), 2024-01-01
Supplement: d4ma00859f1.pdf [file d4ma00859f1.pdf]

## Electronic Supplementary Information

### Enabling Improved PSF Nanocomposite Membrane for Wastewater Treatment with Selective Nanotubular morphology of PANI/ZnO

Aqsa Zahid <sup>a</sup>, Hafiza Hifza Nawaz <sup>b</sup>, Amna Siddique <sup>a</sup>, Basheer Ahmed <sup>a</sup>, Shumaila Razzaque <sup>c</sup>, Xuqing Liu <sup>d</sup>, Humaira Razzaq <sup>a\*</sup>, Muhammad Umar <sup>b\*</sup>.

<sup>a</sup> Department of Chemistry, University of Wah, Quaid Avenue, Wah 47040, Pakistan; uw-21-chm-ms-020@student.uow.edu.pk (A.Z); uw-20s-chm-phd-002@student.uow.edu.pk (A.S.); uw-18-chm-ms-005@student.uow.edu.pk (B.A.); humaira.razzaq@uow.edu.pk (H.R.)

<sup>b</sup> Department of Materials, University of Manchester, Oxford Road, Manchester, M13 9PL, UK; hafizahifza.nawaz@manchester.ac.uk (H.H.N.); muhammad.umar@manchester.ac.uk (M.U.)

<sup>c</sup> Institute of Physical Chemistry, Polish Academy of Sciences, Kasprzaka44/52, 01-224 Warsaw, Poland; srazzaque@ichf.edu.pl (S.R.)

<sup>d</sup> State Key Laboratory of Solidification Processing, Centre of Advanced Lubrication and Seal Materials, School of Materials Science and Engineering, Northwestern Polytechnical University, Xi'an, Shanxi 710072, China; xqliu@nwpu.edu.cn (X.L.)

\*Correspondence: humaira.razzaq@uow.edu.pk (H.R.); muhammad.umar@manchester.ac.uk (M.U.)

## SEM Imaging

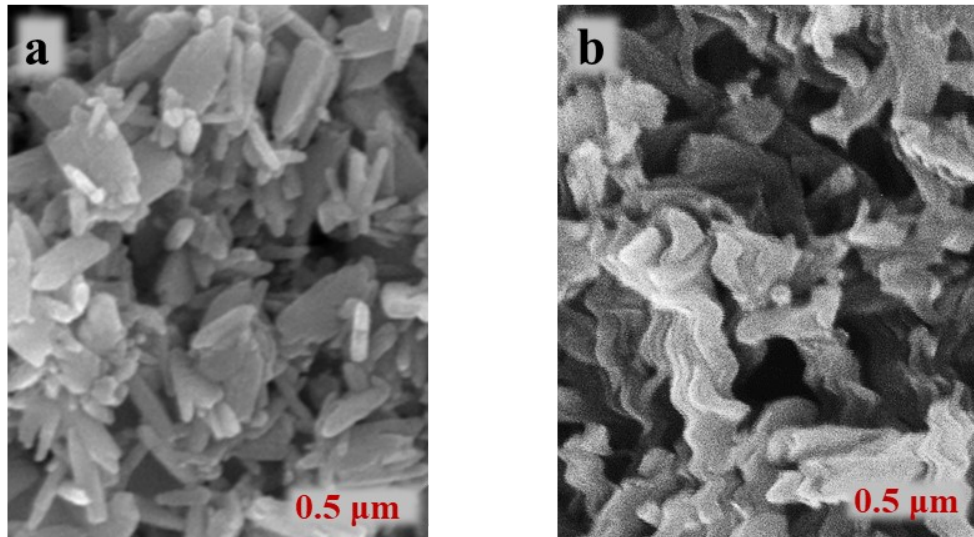

**Figure S 1:** a) SEM images of ZnO, b) SEM image of PANI.

## FTIR Analysis

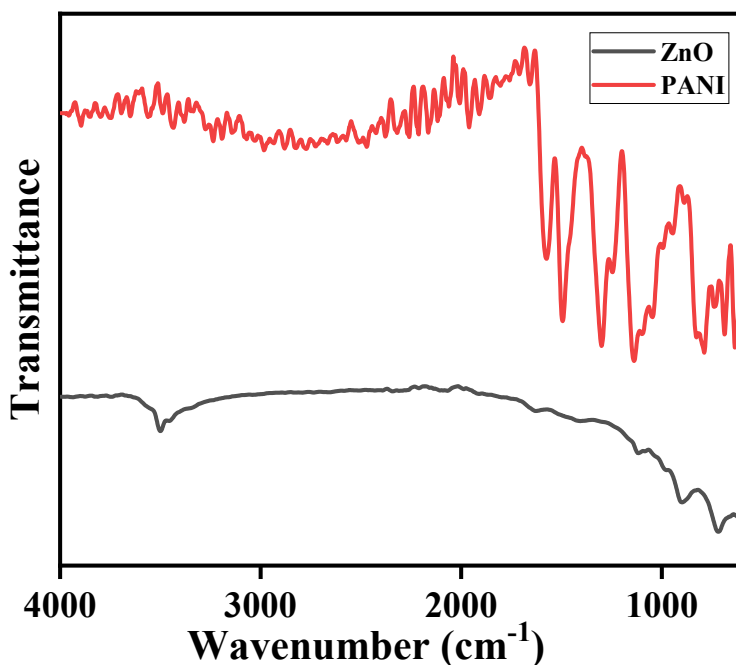

**Figure S 2:** FTIR spectrum of ZnO and PANI.

The FTIR spectrum of ZnO displayed absorption bands at 454.61  $\text{cm}^{-1}$ , 507.44  $\text{cm}^{-1}$ , 709.75  $\text{cm}^{-1}$ , 896.75  $\text{cm}^{-1}$  and 3499.96  $\text{cm}^{-1}$ . [1] The band at 3499.96  $\text{cm}^{-1}$  is attributed to atmospheric moisture's hydroxyl group, while the bands at 507.44  $\text{cm}^{-1}$ , 454.61  $\text{cm}^{-1}$  and 896.75  $\text{cm}^{-1}$  correspond to the stretching and bending vibrations of the Zn-O bond, indicating the successful formation of ZnO. [2] The aromatic and conjugated structure of PANI was confirmed by obtaining absorptions bands at 3220  $\text{cm}^{-1}$  which characterized the N-H stretching vibration of the amine group. [3] The stretching vibrations of C=N and C=C bonds in the quinonoid unit are indicated by an absorption band at 1556  $\text{cm}^{-1}$ , while the C=C stretching vibrations and phenylene diamine in the benzenoid unit are represented by a band at 1484  $\text{cm}^{-1}$ . [4] Furthermore, the stretching vibration of an aromatic amine (Ar-N) is observed at 1304  $\text{cm}^{-1}$ , the stretching vibration of N-Ar-N corresponds to a peak at 1126  $\text{cm}^{-1}$ , and the C-H out-of-plane deformation is attributed to a peak at 804  $\text{cm}^{-1}$ . [5] The spectrum of pristine PSF exhibited characteristic peaks at 1160, 1256, 1280, 1350 and 1400  $\text{cm}^{-1}$ , corresponding to the O=S=O, S-O, C-O-C, S-O symmetric, O-S-O asymmetric and aromatic ring vibrations, [6] respectively.

## XRD Analysis

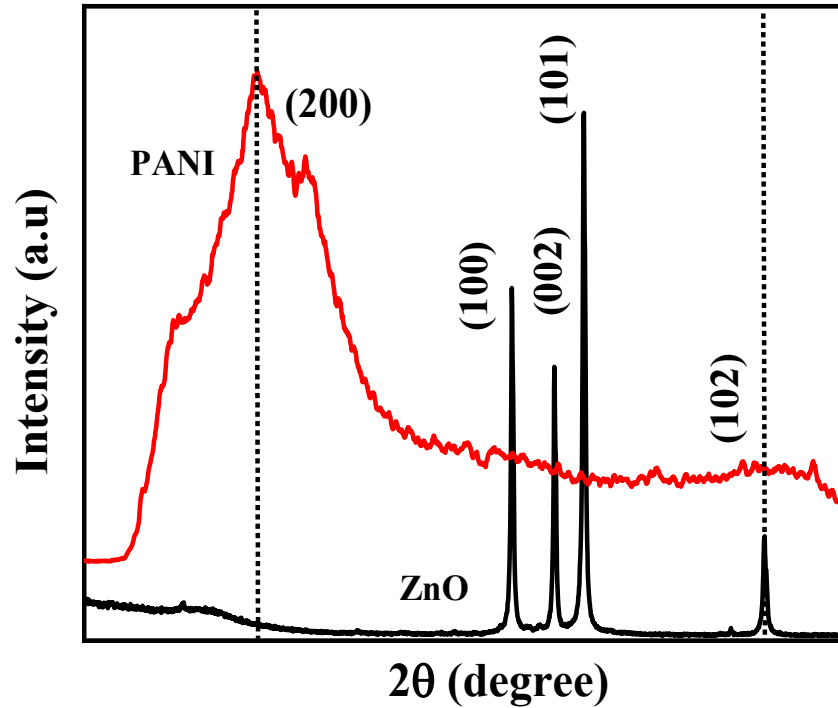

**Figure S 3:** X-ray Diffractogram of ZnO and PANI.

X-ray diffractogram of ZnO revealed the typical pattern of hexagonal wurtzite ZnO with (100), (002), (101), (102), (110) and (103) diffraction peaks. Crystallite size, obtained by applying Scherrer equation was 22.34 nm. XRD pattern of PANI NT's is showing broad diffraction peaks ranging from  $10.1^{\circ}$  and  $30.10^{\circ}$  due to presence of perpendicular and parallel chains in PANI. [7] The diffraction peaks located at an angle of  $2\theta = 25.721^{\circ}$  and  $2\theta = 19.311^{\circ}$  having d spacing values of  $3.461^{\circ}$  and  $4.593^{\circ}$ Å, respectively, showing lower crystallinity or semi-crystalline nature of PANI corresponding to intra-conversion of benzenoid and quinoid units of aromatic rings in polymeric chains. [8, 9]

**Table S 1:** Optimized Compositions of PSF-PANI Nanocomposite Membranes

| Sr. No | Codes   | PSF (wt. %) | PANI (wt. %) | DMF (wt. %) |
|--------|---------|-------------|--------------|-------------|
| 1      | PP 0    | 15          | 0            | 85          |
| 2      | PP 0.05 | 14.95       | 0.05         | 85          |
| 3      | PP 0.15 | 14.85       | 0.15         | 85          |
| 4      | PP 0.25 | 14.75       | 0.25         | 85          |
| 5      | PP 0.30 | 14.70       | 0.30         | 85          |

**Table S2:**  
Composition / codes

**of pristine and ZnO/(PSF-PANI) Composite membranes.**

| Membrane          | Membrane codes | PSF (wt%) | PANI (wt%) | ZnO (wt%) |
|-------------------|----------------|-----------|------------|-----------|
| Pristine PANI-PSF | PP 0           | 15        | 0          | 0         |
| PSF/PANI/ZnO      | PPZ 0.05       | 14.7      | 0.25       | 0.05      |
| PSF/PANI/ZnO      | PPZ 0.1        | 14.65     | 0.25       | 0.1       |
| PSF/PANI/ZnO      | PPZ 0.15       | 14.6      | 0.25       | 0.15      |
| PSF/PANI/ZnO      | PPZ 0.2        | 14.55     | 0.25       | 0.2       |
| PSF/PANI/ZnO      | PPZ 0.25       | 14.5      | 0.25       | 0.25      |
| PSF/PANI/ZnO      | PPZ 0.3        | 14.45     | 0.25       | 0.3       |

### **Strong chemical interaction and intermixing of PANI/ZnO nanofillers in PSF:**

In a (PANI/ZnO)-PSF composite membrane, the phrase "strong chemical interaction and intermixing of PANI/ZnO nanofillers in PSF" highlights the significant bonding between

polyaniline (PANI) and zinc oxide (ZnO) nanofillers with the polysulfone (PSF) matrix. This interaction involves hydrogen bonding between PANI's amine groups and ZnO's hydroxyl groups with PSF's sulfone groups, as well as van der Waals forces due to ZnO's slight polarity. [10] Effective intermixing of these nanofillers within the PSF matrix is crucial for optimal membrane performance, ensuring uniform dispersion and preventing agglomeration, which allows for efficient molecular-level interactions with the PSF matrix. [11] In a (PANI/ZnO)-PSF composite membrane, the phrase "strong chemical interaction and intermixing of ZnO/PANI nanofillers in PSF" encompasses several critical aspects. Polyaniline (PANI), a conducting polymer characterized by a backbone of alternating benzene rings and nitrogen atoms, carries positive charges in its doped state. [12] Zinc oxide (ZnO) possesses oxygen-containing functional groups, such as hydroxyl (OH) groups, on its surface. These functional groups facilitate various interactions, including hydrogen bonding, electrostatic interactions, and covalent bonding with other molecules. [13] The intermolecular interactions between PANI and polysulfone (PSF) involve polar-polar interactions. Additionally, PANI and ZnO can establish a network structure within the PSF matrix through  $\pi$ - $\pi$  stacking, electrostatic attraction, hydrogen bonding, and potential covalent bonding. [14] Collectively, these interactions enhance the mechanical strength and hydrophilicity of the composite material.

*Interactive forces operates among ZnO-(PANI/PSF) membrane*

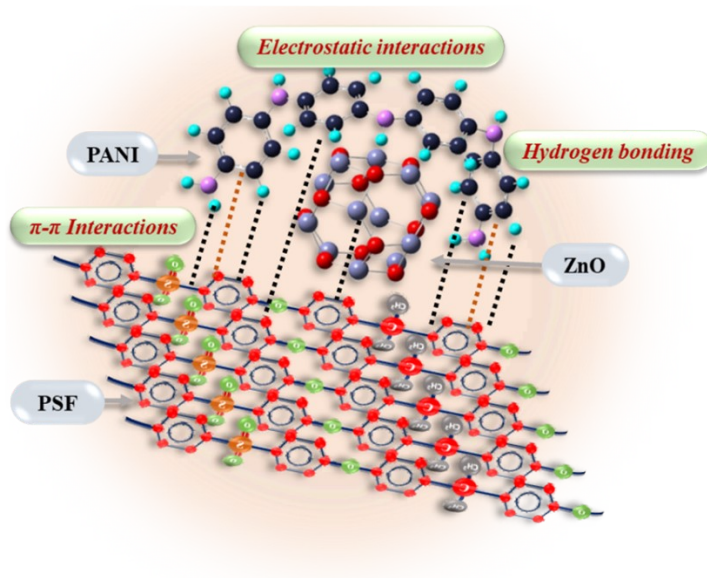

**Figure S4:** Chemical interactions and intermixing of PANI/ZnO nanofillers in PSF



## References

- [1] T. Saad Algarni, N. A. Abduh, A. Al Kahtani, and A. Aouissi, "Photocatalytic degradation of some dyes under solar light irradiation using ZnO nanoparticles synthesized from Rosmarinus officinalis extract," *Green chemistry letters and reviews*, vol. 15, pp. 460-473, 2022.
- [2] A. Spoială, C.-I. Ilie, R.-D. Trușcă, O.-C. Oprea, V.-A. Surdu, B. Ș. Vasile, *et al.*, "Zinc oxide nanoparticles for water purification," *Materials*, vol. 14, p. 4747, 2021.
- [3] N. Al-Obaidi, Z. Al-Garawi, and A. Al-Mahdawi, "Polyaniline doping with nanoparticles: A review on the potential of electrical properties," in *Journal of Physics: Conference Series*, 2021, p. 012055.
- [4] S. Vyas, A. Shukla, S. J. Shivhare, S. Bagal, and N. Upadhyay, "High performance conducting nanocomposites polyaniline (PANI)-CuO with enhanced antimicrobial activity for biomedical applications," *ES Materials & Manufacturing*, vol. 15, pp. 46-52, 2021.
- [5] M. Zhang, H. Ling, S. Ding, Y. Xie, T. Cheng, L. Zhao, *et al.*, "Synthesis of CF@ PANI hybrid nanocomposites decorated with Fe<sub>3</sub>O<sub>4</sub> nanoparticles towards excellent lightweight microwave absorber," *Carbon*, vol. 174, pp. 248-259, 2021.
- [6] S. Bousalem, F. Zeggai, H. Baltach, and A. Benyoucef, "Physical and electrochemical investigations on hybrid materials synthesized by polyaniline with various amounts of ZnO nanoparticle," *Chemical Physics Letters*, vol. 741, p. 137095, 2020.
- [7] Y. Wang and X. Jing, "Formation of Polyaniline Nanofibers: A Morphological Study," *The Journal of Physical Chemistry B*, vol. 112, pp. 1157-1162, 2008/01/01 2008.
- [8] X. W. L. Shi, L. Lu, X. Yang, X. Wu, "Preparation of TiO<sub>2</sub>/ polyaniline nano composite from alyo tropic liquid crystalline solution, ," *Synthetic Metals* pp. 1592525–2529., (2009).
- [9] W. Xue, K. Fang, H. Qiu, J. Li, and W. Mao, "Electrical and magnetic properties of the Fe 3O 4–polyaniline nanocomposite pellets containing DBSA-doped polyaniline and HCl-doped polyaniline with Fe 3O 4 nanoparticles," *Synthetic Metals - SYNTHETIC METAL*, vol. 156, pp. 506-509, 04/01 2006.
- [10] A. Sarihan, "Development of high-permeable PSf/PANI-PAMPSA composite membranes with superior rejection performance," *Materials Today Communications*, vol. 24, p. 101104, 2020.
- [11] N. Li, W. Wang, C. Ma, L. Zhu, X. Chen, B. Zhang, *et al.*, "A novel conductive rGO/ZnO/PSF membrane with superior water flux for electrocatalytic degradation of organic pollutants," *Journal of Membrane Science*, vol. 641, p. 119901, 2022.
- [12] R. Erragued, M. Sharma, C. Costa, M. Bouaziz, and L. M. Gando-Ferreira, "Novel polyethersulfone mixed matrix adsorptive nanofiltration membrane fabricated from embedding zinc oxide coated by polyaniline," *Journal of Environmental Chemical Engineering*, vol. 11, p. 111607, 2023.
- [13] O. T. Mahlangu, G. Mamba, and B. B. Mamba, "A facile synthesis approach for GO-ZnO/PES ultrafiltration mixed matrix photocatalytic membranes for dye removal in water: Leveraging the synergy between photocatalysis and membrane filtration," *Journal of Environmental Chemical Engineering*, vol. 11, p. 110065, 2023.
- [14] J. A. Oyetade, R. L. Machunda, and A. Hilonga, "Functional impacts of polyaniline in composite matrix of photocatalysts: an instrumental overview," *RSC advances*, vol. 13, pp. 15467-15489, 2023.
